# Supplementary material for: Novel Feather Degrading Keratinases from Bacillus cereus Group: Biochemical, Genetic and Bioinformatics Analysis
Source: MDPI journal article supplement (doi:10.3390/microorganisms10010093), 2022-01-01
Supplement: s1 [file s1]

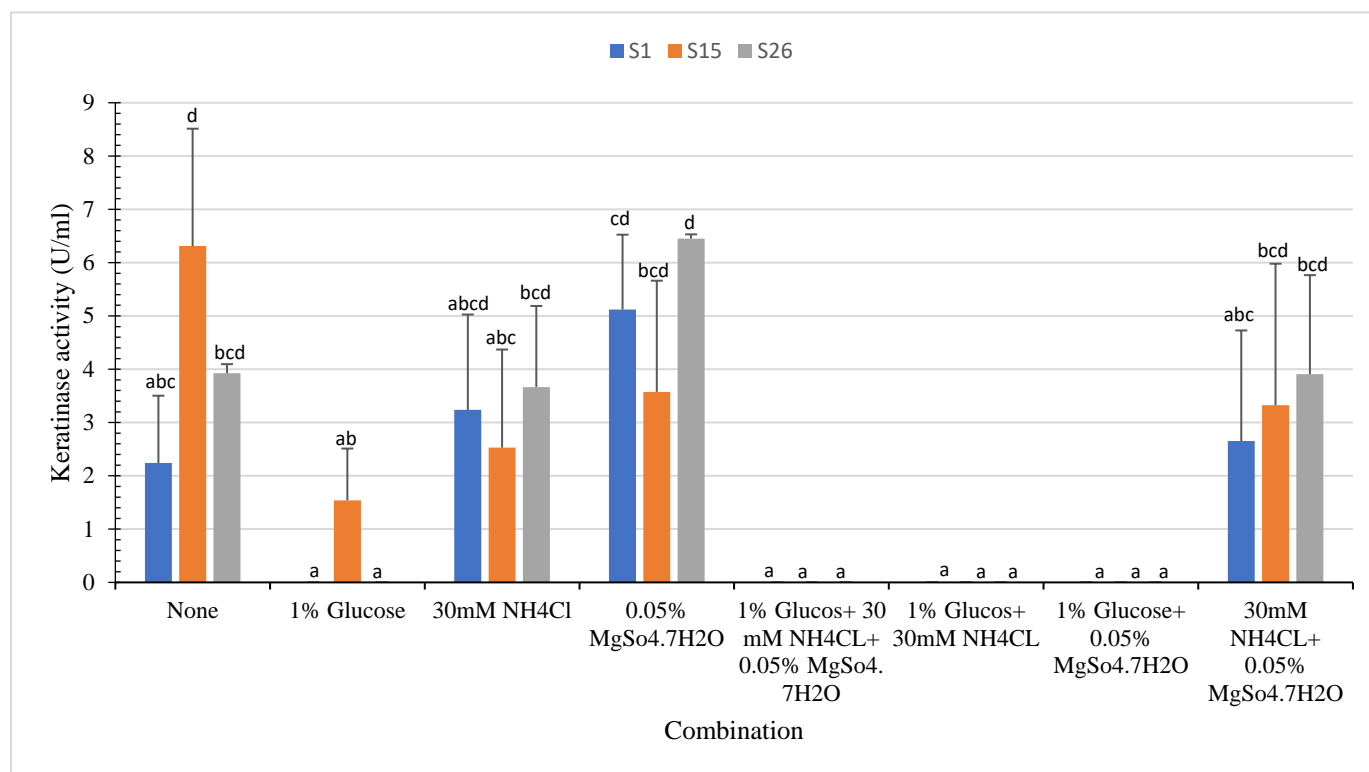

**Figure S1.** Effect of Glucose, NH<sub>4</sub>CL, and MgSO<sub>4</sub>.7H<sub>2</sub>O individually and in combination on keratinase activity by isolates S1, S15, and S26.
