# Supplementary material for: Novel Feather Degrading Keratinases from Bacillus cereus Group: Biochemical, Genetic and Bioinformatics Analysis
Source: MDPI journal article supplement (doi:10.3390/microorganisms10010093), 2022-01-01
Supplement: s1 [file s1]

| M6: Pairwise Distances (C:\Users\Lenovo\AppData\Local\Temp\PhyloAnalysis-16.meg)  |                                                                                   |                                                                                   |                                                                                   |                                                                                   |                                                                                   |                                                                                   |                                                                                   |                                                                                   |                                                                                   |       |       |       |       |       |       |       |       |       |       |       |       |       |       |       |       |       |       |       |  |
|-----------------------------------------------------------------------------------|-----------------------------------------------------------------------------------|-----------------------------------------------------------------------------------|-----------------------------------------------------------------------------------|-----------------------------------------------------------------------------------|-----------------------------------------------------------------------------------|-----------------------------------------------------------------------------------|-----------------------------------------------------------------------------------|-----------------------------------------------------------------------------------|-----------------------------------------------------------------------------------|-------|-------|-------|-------|-------|-------|-------|-------|-------|-------|-------|-------|-------|-------|-------|-------|-------|-------|-------|--|
| File                                                                              | Display                                                                           | Average                                                                           | Caption                                                                           | Help                                                                              |                                                                                   |                                                                                   |                                                                                   |                                                                                   |                                                                                   |       |       |       |       |       |       |       |       |       |       |       |       |       |       |       |       |       |       |       |  |
|  |  |  |  |  |  |  |  |  |  |       |       |       |       |       |       |       |       |       |       |       |       |       |       |       |       |       |       |       |  |
|                                                                                   |                                                                                   |                                                                                   |                                                                                   |                                                                                   |                                                                                   |                                                                                   |                                                                                   |                                                                                   |                                                                                   |       |       |       |       |       |       |       |       |       |       |       |       |       |       |       |       |       |       |       |  |
| 1. kerS26                                                                         |                                                                                   |                                                                                   |                                                                                   |                                                                                   |                                                                                   |                                                                                   |                                                                                   |                                                                                   |                                                                                   |       |       |       |       |       |       |       |       |       |       |       |       |       |       |       |       |       |       |       |  |
| 2. kerS26uv                                                                       | 0.000                                                                             |                                                                                   |                                                                                   |                                                                                   |                                                                                   |                                                                                   |                                                                                   |                                                                                   |                                                                                   |       |       |       |       |       |       |       |       |       |       |       |       |       |       |       |       |       |       |       |  |
| 3. KerS13                                                                         | 0.009                                                                             | 0.009                                                                             |                                                                                   |                                                                                   |                                                                                   |                                                                                   |                                                                                   |                                                                                   |                                                                                   |       |       |       |       |       |       |       |       |       |       |       |       |       |       |       |       |       |       |       |  |
| 4. KerS13uv                                                                       | 0.009                                                                             | 0.009                                                                             | 0.000                                                                             |                                                                                   |                                                                                   |                                                                                   |                                                                                   |                                                                                   |                                                                                   |       |       |       |       |       |       |       |       |       |       |       |       |       |       |       |       |       |       |       |  |
| 5. KerS13uv/ems                                                                   | 0.013                                                                             | 0.013                                                                             | 0.004                                                                             | 0.004                                                                             |                                                                                   |                                                                                   |                                                                                   |                                                                                   |                                                                                   |       |       |       |       |       |       |       |       |       |       |       |       |       |       |       |       |       |       |       |  |
| 6. KerS15                                                                         | 0.009                                                                             | 0.009                                                                             | 0.000                                                                             | 0.000                                                                             | 0.004                                                                             |                                                                                   |                                                                                   |                                                                                   |                                                                                   |       |       |       |       |       |       |       |       |       |       |       |       |       |       |       |       |       |       |       |  |
| 7. KerS15ems                                                                      | 0.009                                                                             | 0.009                                                                             | 0.000                                                                             | 0.000                                                                             | 0.004                                                                             | 0.000                                                                             |                                                                                   |                                                                                   |                                                                                   |       |       |       |       |       |       |       |       |       |       |       |       |       |       |       |       |       |       |       |  |
| 8. KerS39                                                                         | 0.013                                                                             | 0.013                                                                             | 0.004                                                                             | 0.004                                                                             | 0.000                                                                             | 0.004                                                                             | 0.004                                                                             |                                                                                   |                                                                                   |       |       |       |       |       |       |       |       |       |       |       |       |       |       |       |       |       |       |       |  |
| 9. KerS39ems                                                                      | 0.009                                                                             | 0.009                                                                             | 0.000                                                                             | 0.000                                                                             | 0.004                                                                             | 0.000                                                                             | 0.000                                                                             | 0.004                                                                             |                                                                                   |       |       |       |       |       |       |       |       |       |       |       |       |       |       |       |       |       |       |       |  |
| 10. KerS1                                                                         | 0.009                                                                             | 0.009                                                                             | 0.000                                                                             | 0.000                                                                             | 0.004                                                                             | 0.000                                                                             | 0.000                                                                             | 0.004                                                                             | 0.000                                                                             |       |       |       |       |       |       |       |       |       |       |       |       |       |       |       |       |       |       |       |  |
| 11. KerS1ems                                                                      | 0.009                                                                             | 0.009                                                                             | 0.000                                                                             | 0.000                                                                             | 0.004                                                                             | 0.000                                                                             | 0.000                                                                             | 0.004                                                                             | 0.000                                                                             | 0.000 |       |       |       |       |       |       |       |       |       |       |       |       |       |       |       |       |       |       |  |
| 12. WP 000790934.1                                                                | 0.013                                                                             | 0.013                                                                             | 0.004                                                                             | 0.004                                                                             | 0.000                                                                             | 0.004                                                                             | 0.004                                                                             | 0.000                                                                             | 0.004                                                                             | 0.004 | 0.004 |       |       |       |       |       |       |       |       |       |       |       |       |       |       |       |       |       |  |
| 13. WP 061129616.1                                                                | 0.013                                                                             | 0.013                                                                             | 0.004                                                                             | 0.004                                                                             | 0.000                                                                             | 0.004                                                                             | 0.004                                                                             | 0.000                                                                             | 0.004                                                                             | 0.004 | 0.004 | 0.000 |       |       |       |       |       |       |       |       |       |       |       |       |       |       |       |       |  |
| 14. WP 000790931.1                                                                | 0.009                                                                             | 0.009                                                                             | 0.000                                                                             | 0.000                                                                             | 0.004                                                                             | 0.000                                                                             | 0.000                                                                             | 0.004                                                                             | 0.000                                                                             | 0.000 | 0.000 | 0.004 | 0.004 |       |       |       |       |       |       |       |       |       |       |       |       |       |       |       |  |
| 15. WP 048539223.1                                                                | 0.009                                                                             | 0.009                                                                             | 0.000                                                                             | 0.000                                                                             | 0.004                                                                             | 0.000                                                                             | 0.000                                                                             | 0.004                                                                             | 0.000                                                                             | 0.000 | 0.000 | 0.004 | 0.004 | 0.000 |       |       |       |       |       |       |       |       |       |       |       |       |       |       |  |
| 16. WP 171484091.1                                                                | 0.009                                                                             | 0.009                                                                             | 0.000                                                                             | 0.000                                                                             | 0.004                                                                             | 0.000                                                                             | 0.000                                                                             | 0.004                                                                             | 0.000                                                                             | 0.000 | 0.000 | 0.004 | 0.004 | 0.000 | 0.000 |       |       |       |       |       |       |       |       |       |       |       |       |       |  |
| 17. WP 076873679.1                                                                | 0.013                                                                             | 0.013                                                                             | 0.004                                                                             | 0.004                                                                             | 0.009                                                                             | 0.004                                                                             | 0.004                                                                             | 0.009                                                                             | 0.004                                                                             | 0.004 | 0.004 | 0.009 | 0.009 | 0.004 | 0.004 | 0.004 |       |       |       |       |       |       |       |       |       |       |       |       |  |
| 18. WP 076868061.1                                                                | 0.009                                                                             | 0.009                                                                             | 0.000                                                                             | 0.000                                                                             | 0.004                                                                             | 0.000                                                                             | 0.000                                                                             | 0.004                                                                             | 0.000                                                                             | 0.000 | 0.000 | 0.004 | 0.004 | 0.004 | 0.000 | 0.000 | 0.000 | 0.004 |       |       |       |       |       |       |       |       |       |       |  |
| 19. WP 000790930.1                                                                | 0.009                                                                             | 0.009                                                                             | 0.000                                                                             | 0.000                                                                             | 0.004                                                                             | 0.000                                                                             | 0.000                                                                             | 0.004                                                                             | 0.000                                                                             | 0.000 | 0.000 | 0.004 | 0.004 | 0.000 | 0.000 | 0.000 | 0.000 | 0.004 | 0.000 |       |       |       |       |       |       |       |       |       |  |
| 20. MBL3821420.1                                                                  | 0.009                                                                             | 0.009                                                                             | 0.000                                                                             | 0.000                                                                             | 0.004                                                                             | 0.000                                                                             | 0.000                                                                             | 0.004                                                                             | 0.000                                                                             | 0.000 | 0.000 | 0.004 | 0.004 | 0.004 | 0.000 | 0.000 | 0.000 | 0.004 | 0.000 | 0.000 |       |       |       |       |       |       |       |       |  |
| 21. WP 074610243.1                                                                | 0.009                                                                             | 0.009                                                                             | 0.000                                                                             | 0.000                                                                             | 0.004                                                                             | 0.000                                                                             | 0.000                                                                             | 0.004                                                                             | 0.000                                                                             | 0.000 | 0.000 | 0.004 | 0.004 | 0.004 | 0.000 | 0.000 | 0.000 | 0.004 | 0.000 | 0.000 | 0.000 |       |       |       |       |       |       |       |  |
| 22. WP 078420647.1                                                                | 0.000                                                                             | 0.000                                                                             | 0.009                                                                             | 0.009                                                                             | 0.013                                                                             | 0.009                                                                             | 0.009                                                                             | 0.013                                                                             | 0.009                                                                             | 0.009 | 0.009 | 0.013 | 0.013 | 0.009 | 0.009 | 0.009 | 0.013 | 0.009 | 0.009 | 0.009 | 0.009 | 0.009 |       |       |       |       |       |       |  |
| 23. WP 000790938.1                                                                | 0.004                                                                             | 0.004                                                                             | 0.004                                                                             | 0.004                                                                             | 0.009                                                                             | 0.004                                                                             | 0.004                                                                             | 0.009                                                                             | 0.004                                                                             | 0.004 | 0.004 | 0.009 | 0.009 | 0.004 | 0.004 | 0.004 | 0.009 | 0.004 | 0.004 | 0.004 | 0.004 | 0.004 | 0.004 |       |       |       |       |       |  |
| 24. WP 000790937.1                                                                | 0.004                                                                             | 0.004                                                                             | 0.004                                                                             | 0.004                                                                             | 0.009                                                                             | 0.004                                                                             | 0.004                                                                             | 0.009                                                                             | 0.004                                                                             | 0.004 | 0.004 | 0.009 | 0.009 | 0.004 | 0.004 | 0.004 | 0.009 | 0.004 | 0.004 | 0.004 | 0.004 | 0.004 | 0.004 | 0.000 |       |       |       |       |  |
| 25. WP 088859495.1                                                                | 0.004                                                                             | 0.004                                                                             | 0.004                                                                             | 0.004                                                                             | 0.009                                                                             | 0.004                                                                             | 0.004                                                                             | 0.009                                                                             | 0.004                                                                             | 0.004 | 0.004 | 0.009 | 0.009 | 0.004 | 0.004 | 0.004 | 0.009 | 0.004 | 0.004 | 0.004 | 0.004 | 0.004 | 0.000 | 0.000 |       |       |       |       |  |
| 26. WP 065211756.1                                                                | 0.009                                                                             | 0.009                                                                             | 0.009                                                                             | 0.009                                                                             | 0.013                                                                             | 0.009                                                                             | 0.009                                                                             | 0.013                                                                             | 0.009                                                                             | 0.009 | 0.009 | 0.013 | 0.013 | 0.009 | 0.009 | 0.009 | 0.013 | 0.009 | 0.009 | 0.009 | 0.009 | 0.009 | 0.004 | 0.004 | 0.004 |       |       |       |  |
| 27. WP 086395645.1                                                                | 0.009                                                                             | 0.009                                                                             | 0.009                                                                             | 0.009                                                                             | 0.013                                                                             | 0.009                                                                             | 0.009                                                                             | 0.013                                                                             | 0.009                                                                             | 0.009 | 0.009 | 0.013 | 0.013 | 0.009 | 0.009 | 0.009 | 0.013 | 0.009 | 0.009 | 0.009 | 0.009 | 0.009 | 0.004 | 0.004 | 0.004 | 0.009 |       |       |  |
| 28. WP 006918592.1                                                                | 0.009                                                                             | 0.009                                                                             | 0.009                                                                             | 0.009                                                                             | 0.013                                                                             | 0.009                                                                             | 0.009                                                                             | 0.013                                                                             | 0.009                                                                             | 0.009 | 0.009 | 0.013 | 0.013 | 0.009 | 0.009 | 0.009 | 0.013 | 0.009 | 0.009 | 0.009 | 0.009 | 0.009 | 0.004 | 0.004 | 0.004 | 0.009 | 0.009 |       |  |
| 29. WP 153581315.1                                                                | 0.009                                                                             | 0.009                                                                             | 0.009                                                                             | 0.009                                                                             | 0.013                                                                             | 0.009                                                                             | 0.009                                                                             | 0.013                                                                             | 0.009                                                                             | 0.009 | 0.009 | 0.013 | 0.013 | 0.009 | 0.009 | 0.009 | 0.013 | 0.009 | 0.009 | 0.009 | 0.009 | 0.009 | 0.004 | 0.004 | 0.004 | 0.009 | 0.009 | 0.009 |  |
| 30. WP 098771659.1                                                                | 0.004                                                                             | 0.004                                                                             | 0.004                                                                             | 0.004                                                                             | 0.009                                                                             | 0.004                                                                             | 0.004                                                                             | 0.009                                                                             | 0.004                                                                             | 0.004 | 0.004 | 0.009 | 0.009 | 0.004 | 0.004 | 0.004 | 0.009 | 0.004 | 0.004 | 0.004 | 0.004 | 0.000 | 0.000 | 0.000 | 0.004 | 0.004 | 0.004 | 0.004 |  |

**Figure S4.** Estimates of evolutionary divergence of *KerS* gene against S8 family peptidase, *Bacillus cereus* group sequences retrieved from GenBank database.
