# Supplementary material for: Novel Feather Degrading Keratinases from Bacillus cereus Group: Biochemical, Genetic and Bioinformatics Analysis
Source: MDPI journal article supplement (doi:10.3390/microorganisms10010093), 2022-01-01
Supplement: s1 [file s1]

CP007640.1:Bacillus\_atrophaeus   ...CA...T...AC...CA...G...T...  
210      220      230      240      250      260      270      280      290      300

s.26      GACCTGAGAGGGTGATCGGCCACACTGGGACTGAGACACGGCCAGACTCCTACGGGAGGCAGGTAGGGAATCTTCCGCAATGGACGAAAGTCTGACG  
CP063158.1:Bacillus\_cereus  
CP072774.1:Bacillus\_cereus  
CP053972.1:Bacillus\_thuringien  
CP051858.1:Bacillus\_thuringien  
MT372153.1:Bacillus\_manliponen  
MW250250.1:Bacillus\_pacificus  
MW115619.1:Bacillus\_paramycoid  
LC178546.1:Bacillus\_subtilis  
CP050532.1:Bacillus\_subtilis  
CP026662.1:Bacillus\_subtilis  
CP049741.1:Bacillus\_velezensis  
AB592329.1:Bacillus\_lichenifor   ...C...  
MK855401.1:Bacillus\_lichenifor  
CP045814.1:Bacillus\_lichenifor  
CP042252.1:Bacillus\_lichenifor  
LR698983.1:Bacillus\_lichenifor  
AB680855.1:Bacillus\_atrophaeus  
CP002207.1:Bacillus\_atrophaeus  
CP007640.1:Bacillus\_atrophaeus  
310      320      330      340      350      360      370      380      390      400

s.26      GAGCAACGCCGCTGAGTGATGAAGGCTTTCGCGTCGTAAACTCTGTGTTAGGGAAGAACAAAGTGCAGTGAATAAGCTGGCACCTTGACGTACCT  
CP063158.1:Bacillus\_cereus  
CP072774.1:Bacillus\_cereus  
CP053972.1:Bacillus\_thuringien  
CP051858.1:Bacillus\_thuringien  
MT372153.1:Bacillus\_manliponen  
MW250250.1:Bacillus\_pacificus  
MW115619.1:Bacillus\_paramycoid   ...★...★...★★★...★★★  
LC178546.1:Bacillus\_subtilis   ...T...A...G...A.CGT.C...G.GC..T...  
CP050532.1:Bacillus\_subtilis   ...T...A...G...A.CGT.C...G.GC..T...  
CP026662.1:Bacillus\_subtilis   ...T...A...G...A.CGT.C...G.GC..T...  
CP049741.1:Bacillus\_velezensis   ...T...A...G...A.CGT.CA...G.GC..  
AB592329.1:Bacillus\_lichenifor   ...T...A...G...A.CGT.C...G.GC..T...  
MK855401.1:Bacillus\_lichenifor   ...T...A...G...A.CGT.C...G.GC..T...  
CP045814.1:Bacillus\_lichenifor   ...T...A...G...A.CGT.C...G.GC..T...  
CP042252.1:Bacillus\_lichenifor   ...T...A...G...A.CGT.C...G.GC..T...  
LR698983.1:Bacillus\_lichenifor   ...T...A...G...A.CGT.C...G.GC..T...  
AB680855.1:Bacillus\_atrophaeus   ...T...A...G...A.CGT.CA...G.GC..  
CP002207.1:Bacillus\_atrophaeus   ...T...A...G...A.CGT.CA...G.GC..

CP007640.1: *Bacillus\_atrophaeus* .....T.....A.....G.....CGT.CA.....G.GC.....

410 420 430 440 450 460 470 480 490 500

S.26 AACCAGAAAGCCACGGCTAACTACGTGCCAGCAGCCGGGTAATACGTAGGTGGCAAGCGTTATTTTGGGCGTAAAGCGCGCGCAGGTTGGTT

[illegible]

510                    520                    530                    540                    550                    560                    570                    580                    590                    600

s.26 TCTTAAGTCTGATGTGAAAGCCCACGGCTCAACCGTGGAGGGTCATTGGAAACTGGGAGACTTGAGTGCAGAAGAGGAAGTGGAAATTCATGTGTAGCG

[illegible]

.....C.....G.....GA.....G.....C.....

CP007640.1:Bacillus\_atrophaeus .....C.....G.....GA.....G.....C.....  
610 620 630 640 650 660 670 680 690 700  
.....|.....|.....|.....|.....|.....|.....|.....|.....|.....|.....|  
s.26 GTGAATGCGTAGAGATTTGGAGGAACACCACTGGCGAAGGCGACTTTCTGGTCTGTAACTGACCTGAGGCGCGAAGCGTGGGGAGCTAACAGGATTA  
CP063158.1:Bacillus\_cereus .....  
CP072774.1:Bacillus\_cereus .....  
CP053972.1:Bacillus\_thuringien .....  
CP051858.1:Bacillus\_thuringien .....  
MT372153.1:Bacillus\_manliponen .....  
MW250250.1:Bacillus\_pacificus .....  
MW115619.1:Bacillus\_paramycoid .....★.....★.....★.....★.....  
LC178546.1:Bacillus\_subtilis .....G.....C.....G.....A.....G.....  
CP050532.1:Bacillus\_subtilis .....G.....C.....G.....A.....G.....  
CP026662.1:Bacillus\_subtilis .....G.....C.....G.....A.....G.....  
CP049741.1:Bacillus\_velezensis .....G.....C.....G.....A.....G.....  
AB592329.1:Bacillus\_lichenifor .....A.....G.....C.....G.....G.....  
MK855401.1:Bacillus\_lichenifor .....G.....C.....G.....G.....G.....  
CP045814.1:Bacillus\_lichenifor .....G.....C.....G.....G.....G.....  
CP042252.1:Bacillus\_lichenifor .....G.....C.....G.....G.....G.....  
LR698983.1:Bacillus\_lichenifor .....G.....C.....G.....G.....G.....  
AB680855.1:Bacillus\_atrophaeus .....G.....C.....G.....A.....G.....  
CP002207.1:Bacillus\_atrophaeus .....G.....C.....G.....A.....G.....  
CP007640.1:Bacillus\_atrophaeus .....G.....C.....G.....A.....G.....  
710 720 730 740 750 760 770 780 790 800  
.....|.....|.....|.....|.....|.....|.....|.....|.....|.....|.....|

s.26 GATACCCCTGGTAGTCCACGCCGTAACGATGAGTGCTAAGTGTAGAGGGTTTCGCCCTTTAGTGCTGAGTTAACGCATTAAAGCACTCCGCCTGGGGA  
CP063158.1:Bacillus\_cereus .....  
CP072774.1:Bacillus\_cereus .....  
CP053972.1:Bacillus\_thuringien .....  
CP051858.1:Bacillus\_thuringien .....  
MT372153.1:Bacillus\_manliponen .....  
MW250250.1:Bacillus\_pacificus .....  
MW115619.1:Bacillus\_paramycoid .....★.....★.....  
LC178546.1:Bacillus\_subtilis .....G.....C.....C.....C.....  
CP050532.1:Bacillus\_subtilis .....G.....C.....C.....C.....  
CP026662.1:Bacillus\_subtilis .....G.....C.....C.....C.....  
CP049741.1:Bacillus\_velezensis .....G.....C.....C.....C.....  
AB592329.1:Bacillus\_lichenifor .....C.....CA.....  
MK855401.1:Bacillus\_lichenifor .....C.....CA.....  
CP045814.1:Bacillus\_lichenifor .....C.....CA.....  
CP042252.1:Bacillus\_lichenifor .....C.....CA.....  
LR698983.1:Bacillus\_lichenifor .....C.....CA.....  
AB680855.1:Bacillus\_atrophaeus .....G.....C.....C.....C.....  
CP002207.1:Bacillus\_atrophaeus .....G.....C.....C.....C.....

CP007640.1:Bacillus\_atrophaeus .....G.....C.....C..C.....

810 820 830 840 850 860 870 880 890 900

.....|.....|.....|.....|.....|.....|.....|.....|.....|.....|.....|

s.26 GTACGGCTCGCAACGCTGAACCTCAAGGAATTGACGGGGGCCGCCACAGCGGTGGAGCATGTGGTTTAATTCGAAGCAACGCCAAGAACCTTACCAGGT

CP063158.1:Bacillus\_cereus .....|.....|.....|.....|.....|.....|.....|.....|.....|.....|.....|

CP072774.1:Bacillus\_cereus .....|.....|.....|.....|.....|.....|.....|.....|.....|.....|.....|

CP053972.1:Bacillus\_thuringien .....|.....|.....|.....|.....|.....|.....|.....|.....|.....|.....|

CP051858.1:Bacillus\_thuringien .....|.....|.....|.....|.....|.....|.....|.....|.....|.....|.....|

MT372153.1:Bacillus\_manliponen .....|.....|.....|.....|.....|.....|.....|.....|.....|.....|.....|

MW250250.1:Bacillus\_pacificus .....|.....|.....|.....|.....|.....|.....|.....|.....|.....|.....|

MW115619.1:Bacillus\_paramycoid .....★.....★.....|.....|.....|.....|.....|.....|.....|.....|.....|.....|.....|

LC178546.1:Bacillus\_subtilis .....T.....A.....|.....|.....|.....|.....|.....|.....|.....|.....|.....|.....|

CP050532.1:Bacillus\_subtilis .....T.....A.....|.....|.....|.....|.....|.....|.....|.....|.....|.....|.....|

CP026662.1:Bacillus\_subtilis .....T.....A.....|.....|.....|.....|.....|.....|.....|.....|.....|.....|.....|

CP049741.1:Bacillus\_velezensis .....T.....A.....|.....|.....|.....|.....|.....|.....|.....|.....|.....|.....|

AB592329.1:Bacillus\_lichenifor .....T.....A.....|.....|.....|.....|.....|.....|.....|.....|.....|.....|.....|

MK855401.1:Bacillus\_lichenifor .....T.....A.....|.....|.....|.....|.....|.....|.....|.....|.....|.....|.....|

CP045814.1:Bacillus\_lichenifor .....T.....A.....|.....|.....|.....|.....|.....|.....|.....|.....|.....|.....|

CP042252.1:Bacillus\_lichenifor .....T.....A.....|.....|.....|.....|.....|.....|.....|.....|.....|.....|.....|

LR698983.1:Bacillus\_lichenifor .....T.....A.....|.....|.....|.....|.....|.....|.....|.....|.....|.....|.....|

AB680855.1:Bacillus\_atrophaeus .....T.....A.....|.....|.....|.....|.....|.....|.....|.....|.....|.....|.....|

CP002207.1:Bacillus\_atrophaeus .....T.....A.....|.....|.....|.....|.....|.....|.....|.....|.....|.....|.....|

CP007640.1:Bacillus\_atrophaeus .....T.....A.....|.....|.....|.....|.....|.....|.....|.....|.....|.....|.....|

910 920 930 940 950 960 970 980 990 1000

.....|.....|.....|.....|.....|.....|.....|.....|.....|.....|.....|

s.26 CTTGACATCCTCTGAATAACCTAGAGATAGGGCTTCCTTCGGGSCAGAGTGACAGGTGGTGCATGGTTGCTCAGCTCGTGTCTGAGATGTTGGG

CP063158.1:Bacillus\_cereus .....|.....|.....|.....|.....|.....|.....|.....|.....|.....|.....|

CP072774.1:Bacillus\_cereus .....|.....|.....|.....|.....|.....|.....|.....|.....|.....|.....|

CP053972.1:Bacillus\_thuringien .....|.....|.....|.....|.....|.....|.....|.....|.....|.....|.....|

CP051858.1:Bacillus\_thuringien .....|.....|.....|.....|.....|.....|.....|.....|.....|.....|.....|

MT372153.1:Bacillus\_manliponen .....|.....|.....|.....|.....|.....|.....|.....|.....|.....|.....|

MW250250.1:Bacillus\_pacificus .....|.....|.....|.....|.....|.....|.....|.....|.....|.....|.....|

MW115619.1:Bacillus\_paramycoid .....★.....★.....★.....|.....|.....|.....|.....|.....|.....|.....|.....|.....|.....|

LC178546.1:Bacillus\_subtilis .....C..T.....A.G..C.....G.....|.....|.....|.....|.....|.....|.....|.....|.....|.....|.....|

CP050532.1:Bacillus\_subtilis .....C..T.....A.G..C.....G.....|.....|.....|.....|.....|.....|.....|.....|.....|.....|.....|

CP026662.1:Bacillus\_subtilis .....C..T.....A.G..C.....G.....|.....|.....|.....|.....|.....|.....|.....|.....|.....|.....|

CP049741.1:Bacillus\_velezensis .....C..T.....A.G..C.....G.....|.....|.....|.....|.....|.....|.....|.....|.....|.....|.....|

AB592329.1:Bacillus\_lichenifor .....C.....C.....G.....|.....|.....|.....|.....|.....|.....|.....|.....|.....|.....|

MK855401.1:Bacillus\_lichenifor .....C.....C.....G.....|.....|.....|.....|.....|.....|.....|.....|.....|.....|.....|

CP045814.1:Bacillus\_lichenifor .....C.....C.....G.....|.....|.....|.....|.....|.....|.....|.....|.....|.....|.....|

CP042252.1:Bacillus\_lichenifor .....C.....C.....G.....|.....|.....|.....|.....|.....|.....|.....|.....|.....|.....|

LR698983.1:Bacillus\_lichenifor .....C.....C.....G.....|.....|.....|.....|.....|.....|.....|.....|.....|.....|.....|

AB680855.1:Bacillus\_atrophaeus .....C.C.....C.....G.....|.....|.....|.....|.....|.....|.....|.....|.....|.....|.....|

CP002207.1:Bacillus\_atrophaeus .....C.C.....C.....G.....|.....|.....|.....|.....|.....|.....|.....|.....|.....|.....|

CP007640.1:Bacillus\_atrophaeus .....C.C.....C.....G.....

1010 1020 1030 1040 1050 1060 1070 1080 1090 1100

.....|.....|.....|.....|.....|.....|.....|.....|.....|.....|.....|

s.26 TTAAGTCCCGCAACGAGCGCAACCCCTTGATCTTAGTTGCCAATCATTAGTTGGGCACCTCTAAGGTGACTGCCGGTGACAAACCGGAGGAAGGTGGGGATG

CP063158.1:Bacillus\_cereus .....|.....|.....|.....|.....|.....|.....|.....|.....|.....|.....|

CP072774.1:Bacillus\_cereus .....|.....|.....|.....|.....|.....|.....|.....|.....|.....|.....|

CP053972.1:Bacillus\_thuringien .....|.....|.....|.....|.....|.....|.....|.....|.....|.....|.....|

CP051858.1:Bacillus\_thuringien .....|.....|.....|.....|.....|.....|.....|.....|.....|.....|.....|

MT372153.1:Bacillus\_manliponen .....|.....|.....|.....|.....|.....|.....|.....|.....|.....|.....|

MW250250.1:Bacillus\_pacificus .....|.....|.....|.....|.....|.....|.....|.....|.....|.....|.....|

MW115619.1:Bacillus\_paramycoid .....|.....|.....|.....|.....|.....|.....|.....|.....|.....|.....|

LC178546.1:Bacillus\_subtilis .....|.....|.....|.....|.....|.....|.....|.....|.....|.....|.....|

CP050532.1:Bacillus\_subtilis .....|.....|.....|.....|.....|.....|.....|.....|.....|.....|.....|

CP026662.1:Bacillus\_subtilis .....|.....|.....|.....|.....|.....|.....|.....|.....|.....|.....|

CP049741.1:Bacillus\_velezensis .....|.....|.....|.....|.....|.....|.....|.....|.....|.....|.....|

AB592329.1:Bacillus\_lichenifor .....|.....|.....|.....|.....|.....|.....|.....|.....|.....|.....|

MK855401.1:Bacillus\_lichenifor .....|.....|.....|.....|.....|.....|.....|.....|.....|.....|.....|

CP045814.1:Bacillus\_lichenifor .....|.....|.....|.....|.....|.....|.....|.....|.....|.....|.....|

CP042252.1:Bacillus\_lichenifor .....|.....|.....|.....|.....|.....|.....|.....|.....|.....|.....|

LR698983.1:Bacillus\_lichenifor .....|.....|.....|.....|.....|.....|.....|.....|.....|.....|.....|

AB680855.1:Bacillus\_atrophaeus .....|.....|.....|.....|.....|.....|.....|.....|.....|.....|.....|

CP002207.1:Bacillus\_atrophaeus .....|.....|.....|.....|.....|.....|.....|.....|.....|.....|.....|

CP007640.1:Bacillus\_atrophaeus .....|.....|.....|.....|.....|.....|.....|.....|.....|.....|.....|

1110 1120 1130 1140 1150 1160 1170 1180 1190 1200

.....|.....|.....|.....|.....|.....|.....|.....|.....|.....|.....|

s.26 ACGTCAAATCATCATGCCCTTATGACCTGGGCTACACACGTGCTACAATGGACGGTACAAAGAGCGAGACCGCGAGGTGGAGCTAATCTCAATAAA

CP063158.1:Bacillus\_cereus .....|.....|.....|.....|.....|.....|.....|.....|.....|.....|.....|

CP072774.1:Bacillus\_cereus .....|.....|.....|.....|.....|.....|.....|.....|.....|.....|.....|

CP053972.1:Bacillus\_thuringien .....|.....|.....|.....|.....|.....|.....|.....|.....|.....|.....|

CP051858.1:Bacillus\_thuringien .....|.....|.....|.....|.....|.....|.....|.....|.....|.....|.....|

MT372153.1:Bacillus\_manliponen .....|.....|.....|.....|.....|.....|.....|.....|.....|.....|.....|

MW250250.1:Bacillus\_pacificus .....|.....|.....|.....|.....|.....|.....|.....|.....|.....|.....|

MW115619.1:Bacillus\_paramycoid .....|.....|.....|.....|.....|.....|.....|.....|.....|.....|.....|

LC178546.1:Bacillus\_subtilis .....|.....|.....|.....|.....|.....|.....|.....|.....|.....|.....|

CP050532.1:Bacillus\_subtilis .....|.....|.....|.....|.....|.....|.....|.....|.....|.....|.....|

CP026662.1:Bacillus\_subtilis .....|.....|.....|.....|.....|.....|.....|.....|.....|.....|.....|

CP049741.1:Bacillus\_velezensis .....|.....|.....|.....|.....|.....|.....|.....|.....|.....|.....|

AB592329.1:Bacillus\_lichenifor .....|.....|.....|.....|.....|.....|.....|.....|.....|.....|.....|

MK855401.1:Bacillus\_lichenifor .....|.....|.....|.....|.....|.....|.....|.....|.....|.....|.....|

CP045814.1:Bacillus\_lichenifor .....|.....|.....|.....|.....|.....|.....|.....|.....|.....|.....|

CP042252.1:Bacillus\_lichenifor .....|.....|.....|.....|.....|.....|.....|.....|.....|.....|.....|

LR698983.1:Bacillus\_lichenifor .....|.....|.....|.....|.....|.....|.....|.....|.....|.....|.....|

AB680855.1:Bacillus\_atrophaeus .....|.....|.....|.....|.....|.....|.....|.....|.....|.....|.....|

CP002207.1:Bacillus\_atrophaeus .....|.....|.....|.....|.....|.....|.....|.....|.....|.....|.....|

CP007640.1:Bacillus\_atrophaeus .....A.A.....G.A..G.....TA...C...C...T

.....|.....

S.26 .....CGGTTCTCA

CP063158.1:Bacillus\_cereus .....|.....

CP072774.1:Bacillus\_cereus .....|.....

CP053972.1:Bacillus\_thuringien .....|.....

CP051858.1:Bacillus\_thuringien .....|.....

MT372153.1:Bacillus\_manliponen .....|.....

MW250250.1:Bacillus\_pacificus .....★.....

MW115619.1:Bacillus\_paramycoid .....|.....

LC178546.1:Bacillus\_subtilis .....T.....

CP050532.1:Bacillus\_subtilis .....T.....

CP026662.1:Bacillus\_subtilis .....T.....

CP049741.1:Bacillus\_velezensis .....T.....

AB592329.1:Bacillus\_lichenifor .....T.....

MK855401.1:Bacillus\_lichenifor .....T.....

CP045814.1:Bacillus\_lichenifor .....T.....

CP042252.1:Bacillus\_lichenifor .....T.....

LR698983.1:Bacillus\_lichenifor .....T.....

AB680855.1:Bacillus\_atrophaeus .....T.....

CP002207.1:Bacillus\_atrophaeus .....T.....

CP007640.1:Bacillus\_atrophaeus .....T.....

**Figure S3.** Multiple sequence analysis of 16S rRNA gene, strain S26 against sequences retrieved from GenBank database. Stars correspond to the 58 major substitution position differentiated between *B. subtilis* and *B. cereus* groups. Strain S26 is identical to *B. cereus* groups sequences.
