# Supplementary material for: Novel Feather Degrading Keratinases from Bacillus cereus Group: Biochemical, Genetic and Bioinformatics Analysis
Source: MDPI journal article supplement (doi:10.3390/microorganisms10010093), 2022-01-01
Supplement: s1 [file s1]

**Table S1.** BLASTp analysis of keratinase *kerS* showing deduced amino acid, total score, query cover, E-value and percentage of identity.

| <b>Keratinase gene</b> | <b>Deduced amino acid</b> | <b>Total score</b> | <b>Query cover</b> | <b>E-value</b>  | <b>% of identity</b> |
|------------------------|---------------------------|--------------------|--------------------|-----------------|----------------------|
| <i>KerS1</i>           | 234                       | (481-483)          | 100%               | (1e-168-4e-170) | (99.15%-100%)        |
| <i>KerS1ems</i>        | 397                       | (795-805)          | 100%               | 0.0             | (98.24%-100%)        |
| <i>KerS13</i>          | 397                       | (795-805)          | 100%               | 0.0             | (98.24%-100%)        |
| <i>KerS13uv</i>        | 397                       | (795-805)          | 100%               | 0.0             | (98.24%-100%)        |
| <i>KerS13uv+ems</i>    | 397                       | (793-804)          | 100%               | 0.0             | (97.98%-100%)        |
| <i>KerS15</i>          | 397                       | (795-805)          | 100%               | 0.0             | (98.24%-100%)        |
| <i>KerS15ems</i>       | 397                       | (795-805)          | 100%               | 0.0             | (98.24%-100%)        |
| <i>KerS26</i>          | 397                       | (795-805)          | 100%               | 0.0             | (98.24%-100%)        |
| <i>KerS26uv</i>        | 397                       | (795-805)          | 100%               | 0.0             | (98.24%-100%)        |
| <i>KerS39</i>          | 295                       | (593-601)          | (99%-100%)         | 0.0             | (98.64%-100%)        |
| <i>KerS39ems</i>       | 269                       | (547-551)          | 100%               | 0.0             | (99.26%-100%)        |
