# Supplementary material for: Novel Feather Degrading Keratinases from Bacillus cereus Group: Biochemical, Genetic and Bioinformatics Analysis
Source: MDPI journal article supplement (doi:10.3390/microorganisms10010093), 2022-01-01
Supplement: s1 [file s1]

**Table S2.** BLASTp analysis of *KerS* gene (*KerS13*, *KerS13uv+ems*, and *KerS26uv*) and the corresponding similar peptidase S8 *B. cereus* group species.

| Isolate name        | No. | Accession No.  | Species                                                     | % Identity |
|---------------------|-----|----------------|-------------------------------------------------------------|------------|
| <i>KerS13</i>       | 1   | WP_076873679.1 | S8 family peptidase [ <i>Bacillus cereus</i> group]         | 99.75%     |
|                     | 2   | WP_171484091.1 | S8 family serine peptidase [ <i>Bacillus paranthracis</i> ] | 99.75%     |
|                     | 3   | WP_088068318.1 | S8 family peptidase [ <i>Bacillus thuringiensis</i> ]       | 99.24%     |
|                     | 4   | PFJ29283.1     | alkaline serine protease [ <i>Bacillus anthracis</i> ]      | 98.99%     |
|                     | 5   | WP_144655882.1 | S8 family peptidase [ <i>Bacillus tropicus</i> ]            | 98.99%     |
|                     | 6   | WP_074563627.1 | S8 family peptidase [ <i>Bacillus cereus</i> ]              | 98.74%     |
| <i>KerS13uv+ems</i> | 1   | WP_061129616.1 | S8 family peptidase [ <i>Bacillus cereus</i> ]              | 99.75%     |
|                     | 2   | WP_098852855.1 | S8 family peptidase [ <i>Bacillus thuringiensis</i> ]       | 98.74%     |
|                     | 3   | WP_197225397.1 | S8 family peptidase [ <i>Bacillus paranthracis</i> ]        | 98.49%     |
|                     | 4   | WP_098616758.1 | S8 family peptidase [ <i>Bacillus cereus</i> group]         | 98.24%     |
|                     | 5   | MBL3821420.1   | peptidase S8 [ <i>Bacillus cereus</i> ]                     | 99.24%     |
|                     | 6   | PES75482.1     | alkaline serine protease [ <i>Bacillus anthracis</i> ]      | 98.24%     |
| <i>KerS26uv</i>     | 1   | WP_078420647.1 | S8 family peptidase [ <i>Bacillus cereus</i> ]              | 100%       |
|                     | 2   | WP_044584435.1 | S8 family peptidase [ <i>Bacillus bombysepticus</i> ]       | 99.24%     |
|                     | 3   | WP_098356006.1 | S8 family peptidase [ <i>Bacillus thuringiensis</i> ]       | 98.99%     |
|                     | 4   | TBL05390.1     | peptidase S8 [ <i>Bacillus paranthracis</i> ]               | 98.99%     |
|                     | 5   | WP_213745030.1 | S8 family serine peptidase [ <i>Bacillus toyonensis</i> ]   | 98.74%     |
|                     | 6   | WP_099686350.1 | S8 family peptidase [ <i>Bacillus fungorum</i> ]            | 98.74%     |
|                     | 7   | WP_226638973.1 | S8 family peptidase [ <i>Bacillus tropicus</i> ]            | 98.74%     |
|                     | 8   | WP_098158349.1 | S8 family peptidase [ <i>Bacillus toyonensis</i> ]          | 98.49%     |
